# Supplementary material for: FXS causing missense mutations disrupt FMRP granule formation, dynamics, and function
Source: PubMed Central journal article supplement (PMC8903291; doi:10.1371/journal.pgen.1010084), 2022-02-24

Figure S1. KH domain mutants disrupt FMRP function when overexpressed in larval MNs

**A.**

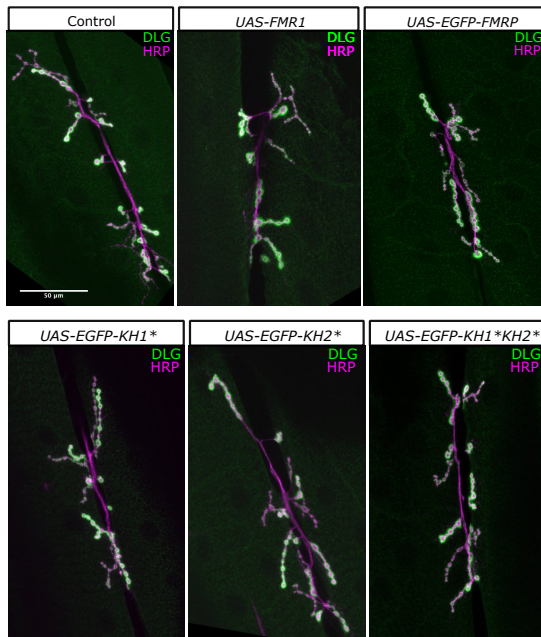

**B.**

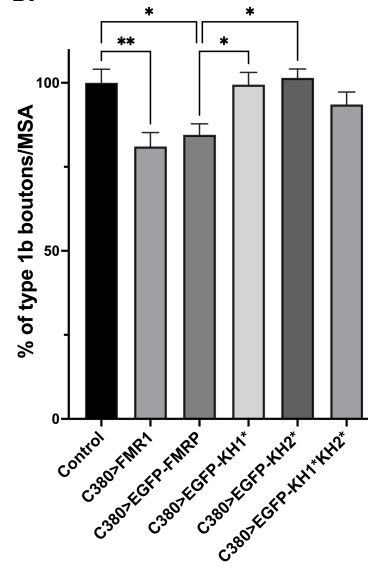

Supplement: pgen.1010084.s002.pdf [file pgen.1010084.s002.pdf]
