# Supplementary material for: FXS causing missense mutations disrupt FMRP granule formation, dynamics, and function
Source: PubMed Central journal article supplement (PMC8903291; doi:10.1371/journal.pgen.1010084), 2022-02-24

Figure S2: FXS-causing mutations alter the liquid-like nature of stress granules

+ Arsenite treatment and 1,6 hexanediol

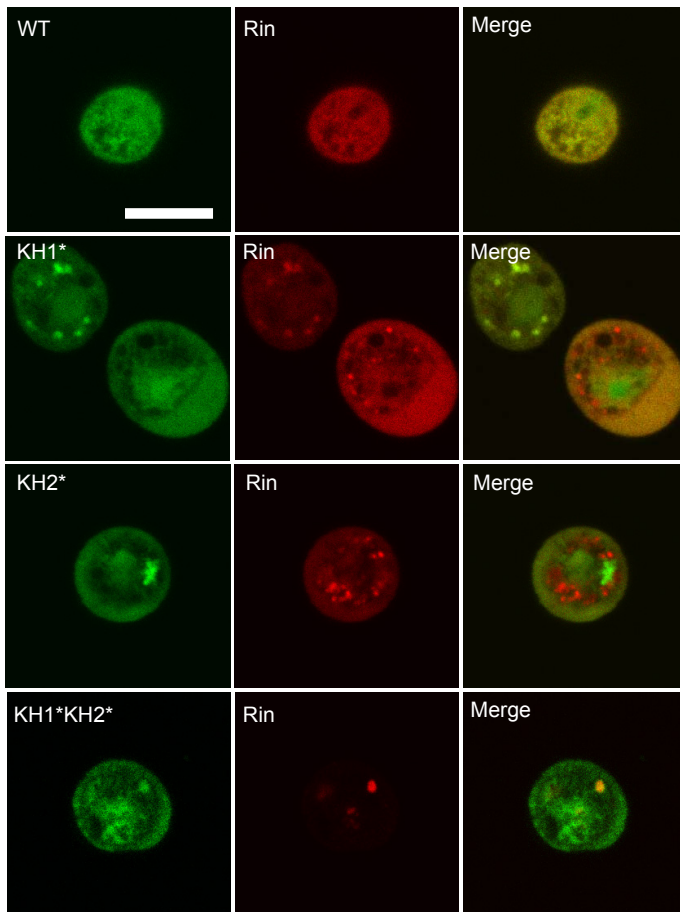

Supplement: pgen.1010084.s003.pdf [file pgen.1010084.s003.pdf]
